# Supplementary material for: Oxidative stress–induced autonomous activation of the calcium/calmodulin-dependent kinase II involves disulfide formation in the regulatory domain
Source: PubMed Central journal article supplement (PMC9643438; doi:10.1016/j.jbc.2022.102579), 2022-10-08
Supplement: mmc1.pdf [file mmc1.pdf]

## Supporting information

### **Oxidative stress-induced autonomous activation of the Calcium/Calmodulin-Dependent Kinase II involves disulfide formation in the regulatory domain**

***Nathália Rocco-Machado<sup>1</sup>, Lo Lai<sup>1</sup>, Geumsoo Kim<sup>1</sup>, Yi He<sup>2</sup>, Elizabeth D. Luczak<sup>3</sup>, Mark E. Anderson<sup>3,4,5</sup>, Rodney L. Levine<sup>1\*</sup>***

<sup>1</sup> Laboratory of Biochemistry, National Heart, Lung and Blood Institute, Maryland, United States of America, <sup>2</sup> Fermentation Facility, National Heart, Lung, and Blood Institute, National Institutes of Health, Maryland, United States of America. <sup>3</sup> Division of Cardiology, Department of Medicine, Johns Hopkins University, Baltimore, United States of America, <sup>4</sup> Department of Physiology and Program in Cellular and Molecular Medicine, The Johns Hopkins University School of Medicine, Baltimore, MD 21205, USA, <sup>5</sup> Department of Genetic Medicine, The Johns Hopkins University School of Medicine, Baltimore, MD 21205, USA

\*Corresponding author E-mail: rlevine@nih.gov

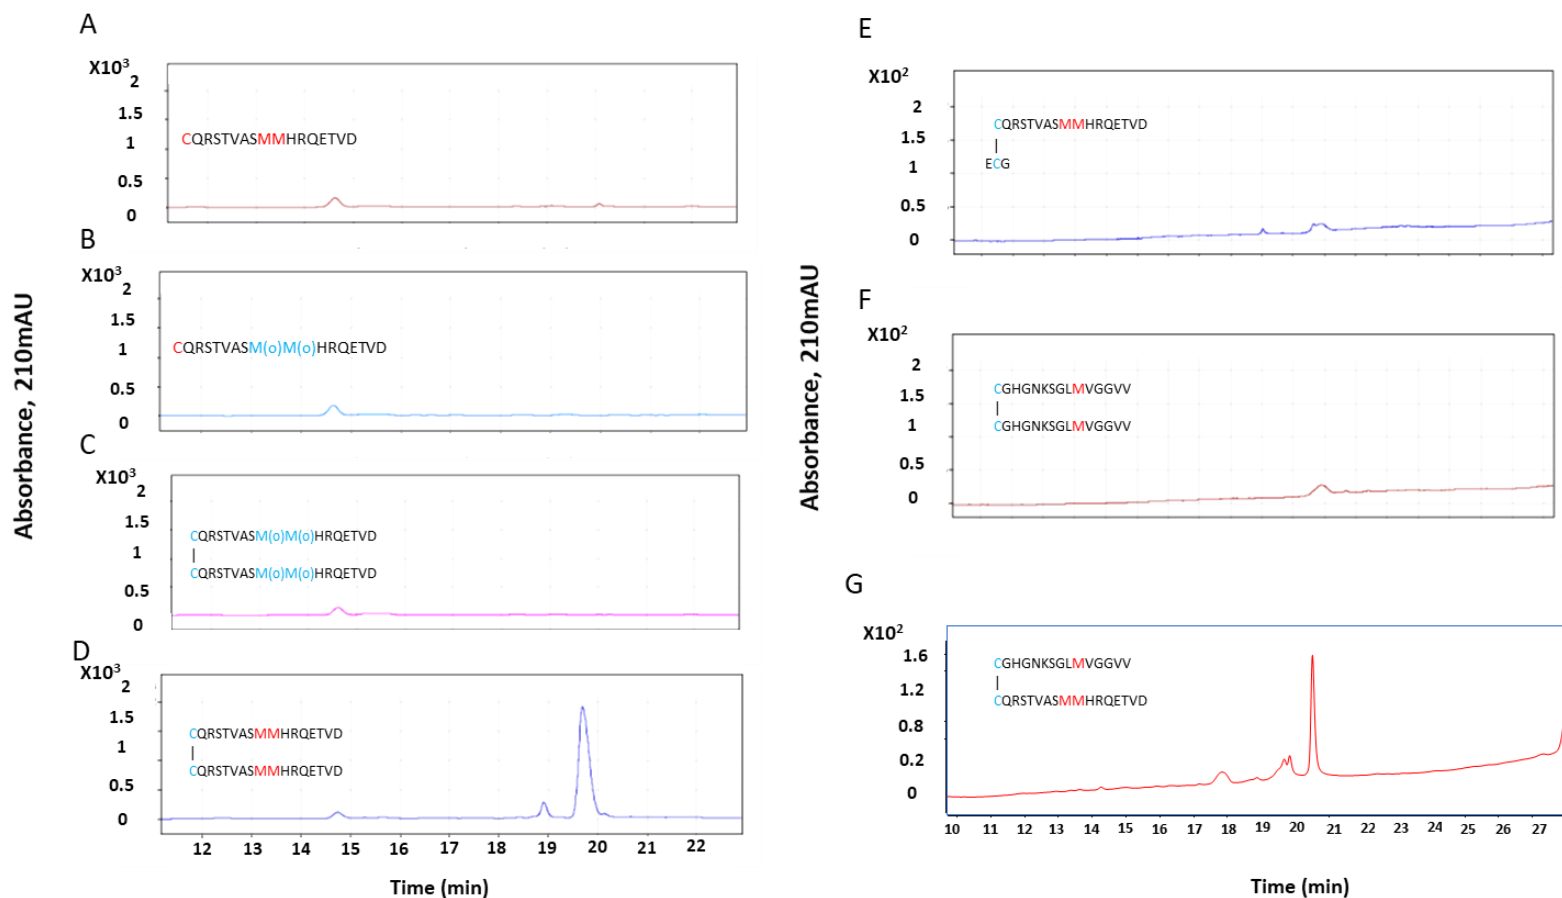

**Supplementary figure 1: The antiserum raised against the H<sub>2</sub>O<sub>2</sub>-exposed peptide detects disulfide-containing CaMKII and not Met281/Met282 sulfoxide.** Protein A magnetic beads were coupled with ox-CaMKII antibody and incubated with the different peptide samples, as indicated in the figure. Their binding was determined by HPLC-mass spectrometry (representative image of n=2 replicates).

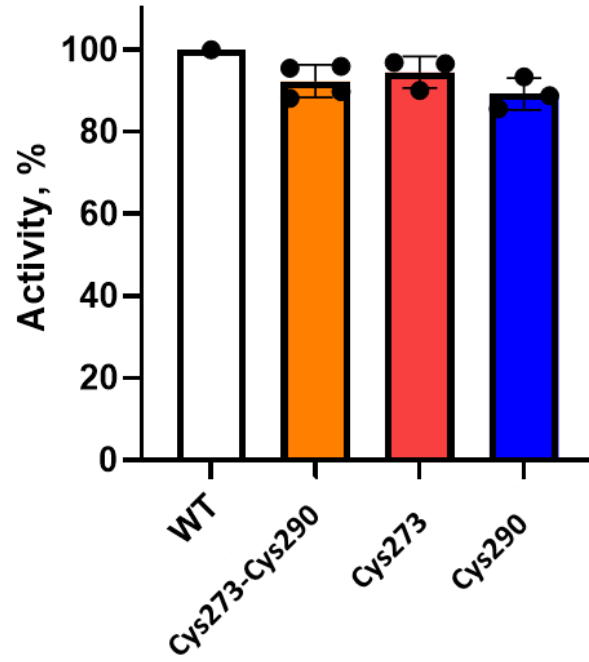

**Supplementary figure 2: No difference between Wild Type and CaMKII mutants' total activity.** n=3 replicates. Normalized to 100% for the Wild Type.

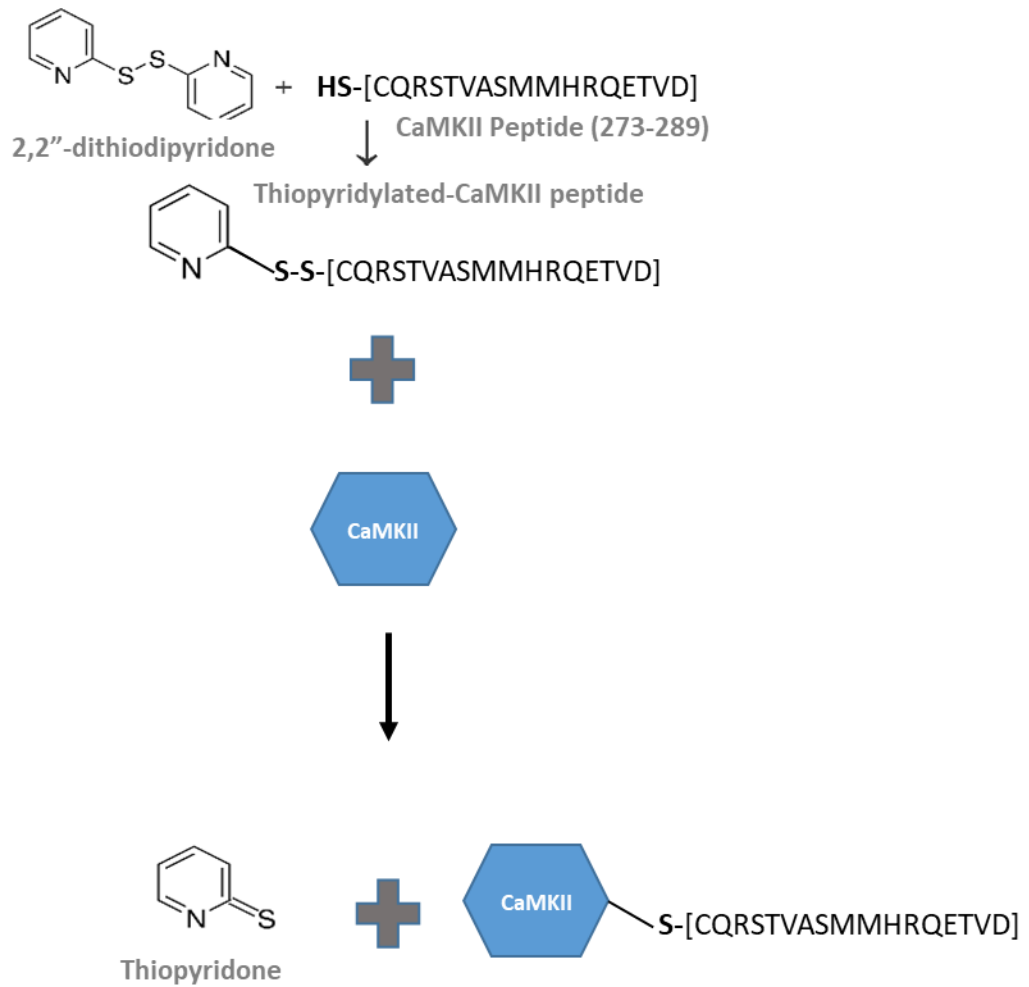

**Supplementary figure 3: Synthesis of thiopyridylated-CaMKII peptide and CaMKII derivatization.**

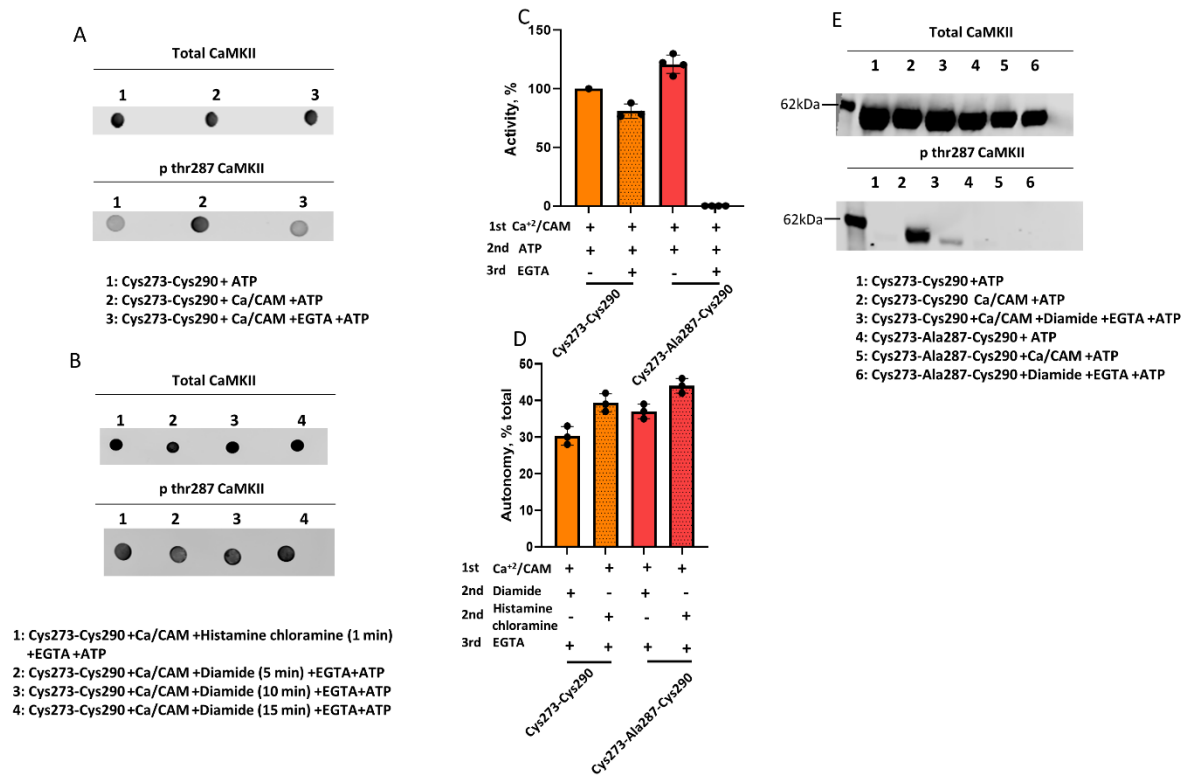

**Supplementary figure 4: Autonomy induced by diamide does not depend on Thr287 phosphorylation.** (A) Dot Blot - Purified CaMKII Cys273-Cys290 incubated with ATP, Ca<sup>2+</sup>/CAM + ATP or Ca<sup>2+</sup>/CAM + EGTA + ATP was probed with anti-CaMKII antibody or anti-Thr287 phosphorylated antibody (representative image of n=3 replicates). As expected, the sample was only recognized by the anti-Thr287 phosphorylated antibody when incubated with Ca<sup>2+</sup>/CAM and ATP. When ATP was added after Ca<sup>2+</sup>/CAM chelation by EGTA no phosphorylation was observed. (B) However, when Cys273-Cys290 was incubated with Ca<sup>2+</sup>/CAM and histamine chloramine (1min) or diamide (5, 10 or 15min), the phosphorylation of Thr287 occurred even after Ca<sup>2+</sup>/CAM chelation. This result indicates that disulfide formation keeps the CaMKII catalytic site open even in the absence of Ca<sup>2+</sup>/CAM. (C) Purified CaMKII Cys273-Cys290 and Cys273-Ala287-Cys290 total activity (without EGTA) and pThr287 induced autonomous activity (after EGTA addition). N=4 replicates. Normalized to Cys273-Cys290 at 100%. (D) Purified CaMKII Cys273-Cys290 and Cys273-Ala287-Cys290 oxidation induced autonomous activity (after EGTA addition). n=3 replicates. % of total activity (no EGTA addition). (E) Western Blot - Purified CaMKII Cys273-Cys290 and Cys273-Ala287-Cys290 were incubated under the conditions indicated in the figure and probed with anti-CaMKII antibody or anti-Thr287 phosphorylated antibody (representative image of n=3 replicates).

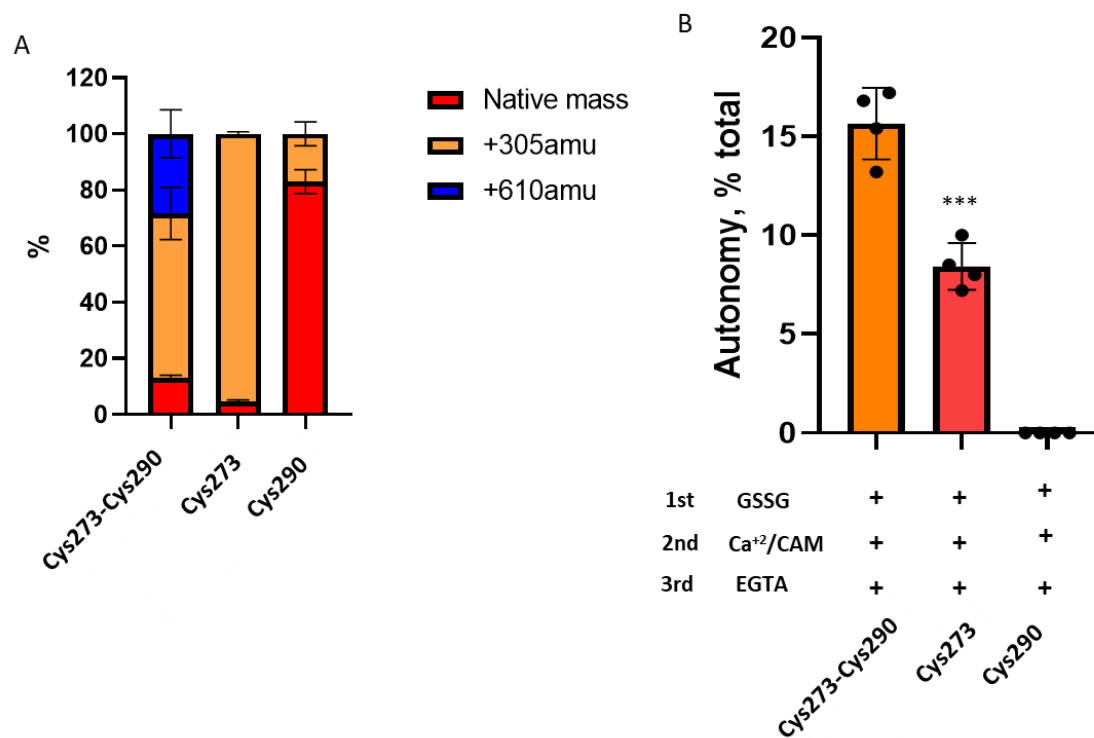

**Supplementary figure 5: Glutathionylation of CaMKII Cys273-Cys290 and Cys273 induces autonomy.** Purified CaMKII Cys273-Cys290, Cys273, and Cys290 were incubated with oxidized glutathione (GSSG). **(A)** The mass of the proteins before and after the incubation with GSSG was measured using HPLC-MS/MS. Each glutathione attached to the protein adds 305amu. **(B)** CaMKII mutants after incubation with GSSG autonomous activity (after EGTA addition). n=4 replicates. % of total activity (no EGTA addition). \*\*\* P=0.005 compared with Cys273-Cys290 mutant by unpaired t-test.

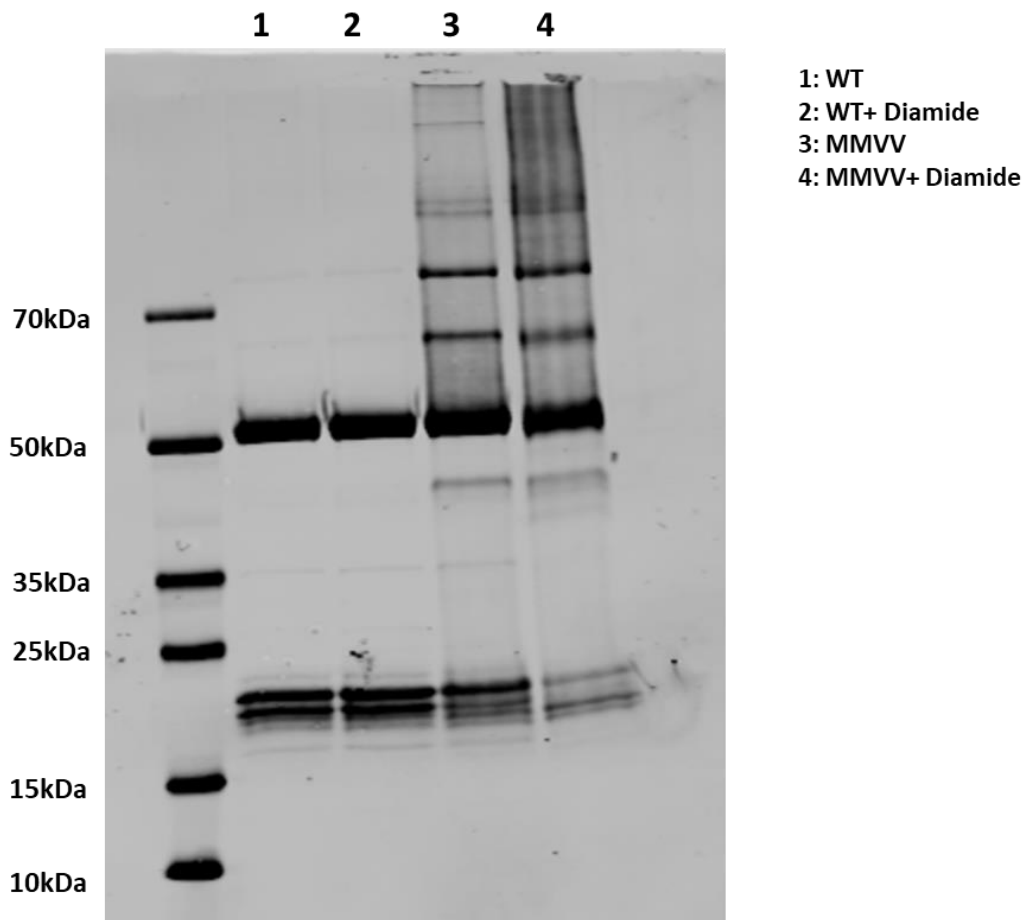

**Supplementary figure 6: Purified MMVV CaMKII shows aggregation and degradation.** Purified CaMKII WT and MMVV mutant were incubated or not with diamide and probed with anti-CaMKII antibody. Representative image of n=3 replicates.

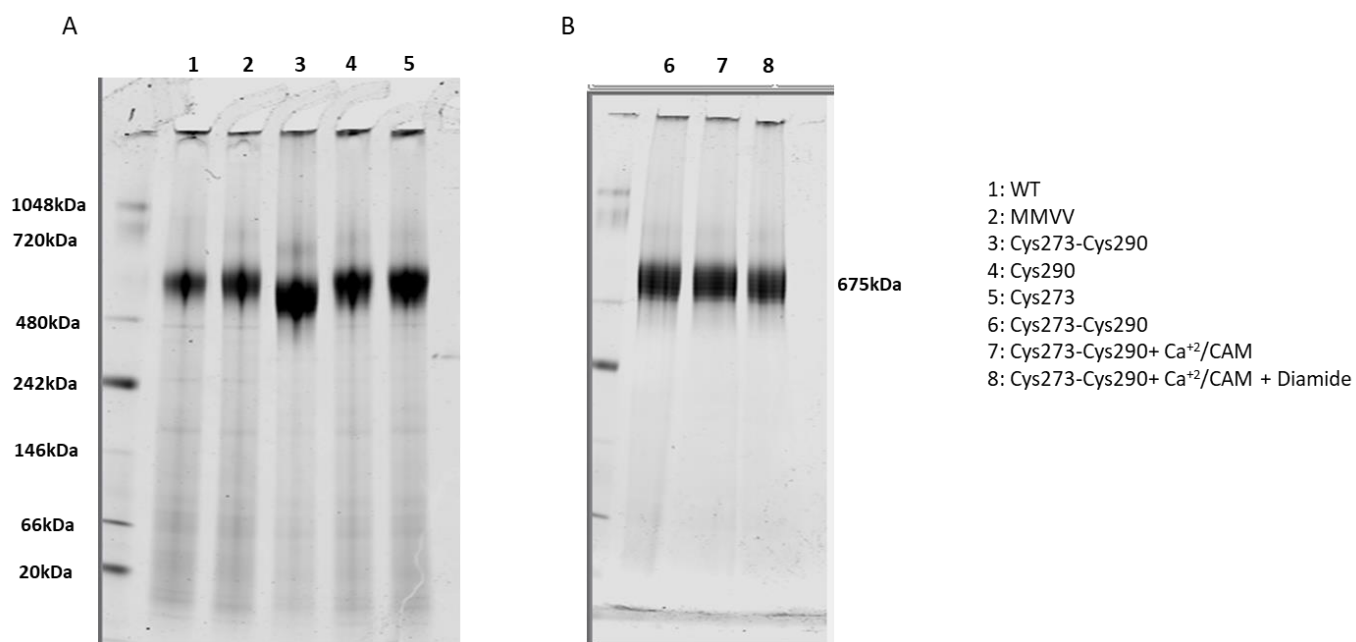

**Supplementary figure 7: CaMKII dodecamer formation. (A)** Blue Native gel showing CaMKII dodecamer formation by all CaMKII mutants used in this work and WT. **(B)** Cys273-Cys290 dodecamer after incubation with Ca<sup>2+</sup>/CAM or Ca<sup>2+</sup>/CAM + diamide.



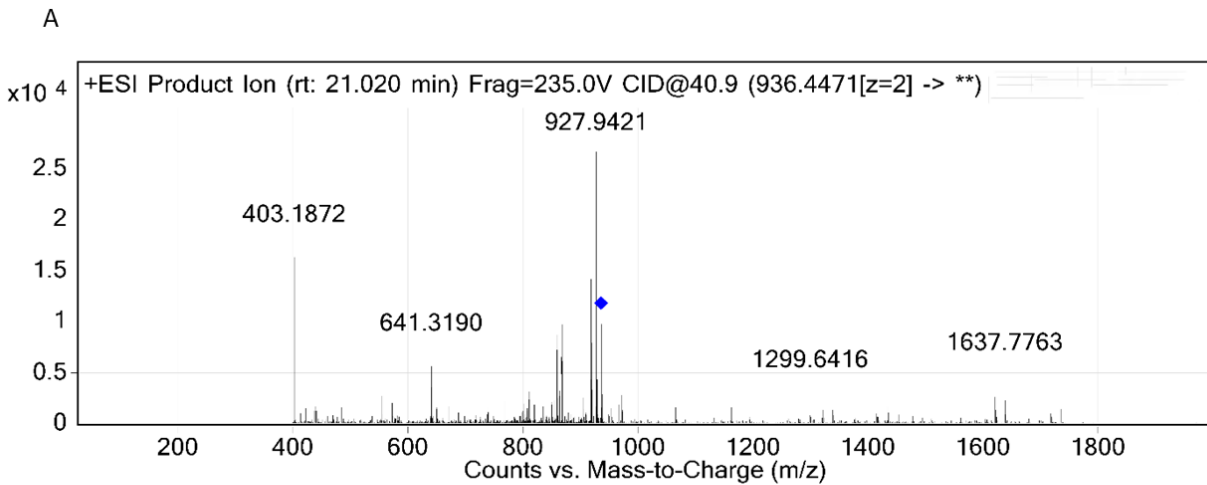

B

| Cys273→Cys290 H <sub>1</sub> P <sub>2</sub> W <sub>3</sub> L <sub>4</sub> C <sub>5</sub> Q <sub>6</sub> R <sub>7</sub> -→Q <sub>8</sub> E <sub>9</sub> T <sub>10</sub> V <sub>11</sub> D <sub>12</sub> C <sub>13</sub> L <sub>14</sub> K <sub>15</sub> |         |                |              |
|--------------------------------------------------------------------------------------------------------------------------------------------------------------------------------------------------------------------------------------------------------|---------|----------------|--------------|
| y'                                                                                                                                                                                                                                                     | Residue | Calculated m/z | Observed m/z |
| 14                                                                                                                                                                                                                                                     | Pro     | 1734.83        | 1734.84      |
| 13                                                                                                                                                                                                                                                     | Trp     | 1637.78        | 1637.78      |
| 12                                                                                                                                                                                                                                                     | Ile     | 1451.70        | 1451.70      |
| 11                                                                                                                                                                                                                                                     | Cys     | 1338.61        | 1338.61      |
| Cys290→Cys273 Q <sub>1</sub> E <sub>2</sub> T <sub>3</sub> V <sub>4</sub> D <sub>5</sub> C <sub>6</sub> L <sub>7</sub> K <sub>8</sub> -→H <sub>9</sub> P <sub>10</sub> W <sub>11</sub> L <sub>12</sub> C <sub>13</sub> Q <sub>14</sub> R <sub>15</sub> |         |                |              |
| y'                                                                                                                                                                                                                                                     | Residue | Calculated m/z | Observed m/z |
| 14                                                                                                                                                                                                                                                     | Glu     | 1743.83        | 1743.82      |
| 13                                                                                                                                                                                                                                                     | Thr     | 1614.79        | 1614.77      |
| 12                                                                                                                                                                                                                                                     | Val     | 1513.74        | 1513.74      |
| 11                                                                                                                                                                                                                                                     | Asp     | 1414.67        | 1414.67      |
| 10                                                                                                                                                                                                                                                     | Cys     | 1299.64        | 1299.64      |
| 9                                                                                                                                                                                                                                                      | Leu     | 1197.64        | 1197.60      |
| 8                                                                                                                                                                                                                                                      | Lys     | 1084.56        | 1084.50      |

**Supplementary Figure 8: MS/MS peak assignments for the Cys273-Cys290 disulfide-linked dipeptide. (A)** The MS/MS spectra of disulfide-linked peptides is very complex because both peptides contribute ions, a, b, x, y', z' and others. Analysis can be simplified by first calculating the y' m/z for both peptides and then identifying the peaks observed in the MS/MS spectrum. **(B)** Expected peaks were calculated by GPMW from the carboxyl terminus to the amino terminus. As shown in the table, the dipeptide was unambiguously identified.

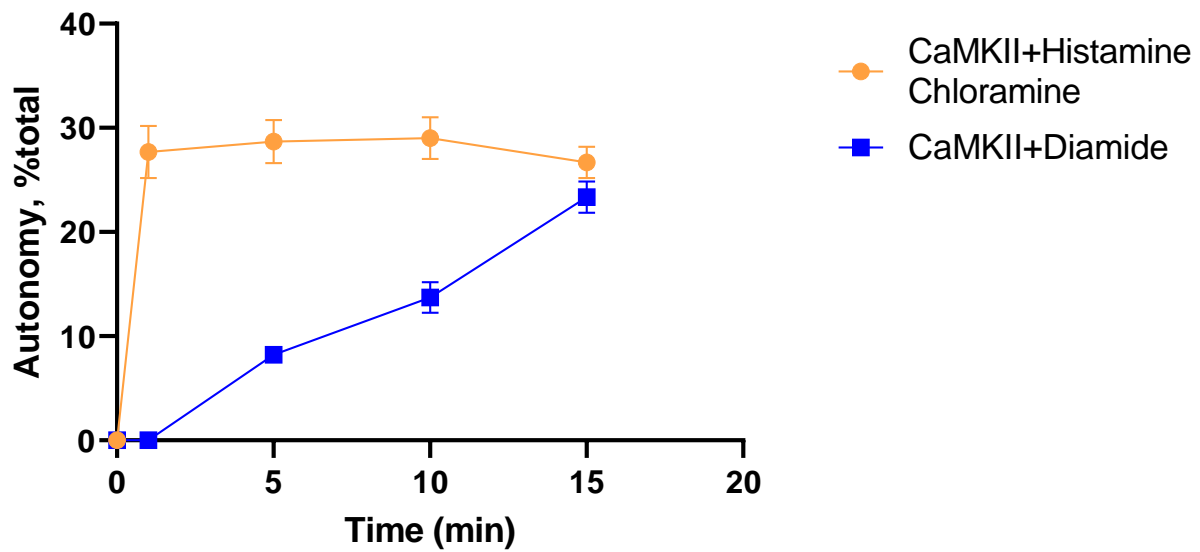

**Supplementary figure 9: Time course of CaMKII autonomy induced by diamide or histamine chloramine.** Purified CaMKII Cys273-Cys290 was incubated with diamide (blue) or histamine chloramine (yellow) for 1, 5, 10 and 15 min and autonomous activity (after EGTA addition) was measured. n=3 replicates. % of total activity (no EGTA addition).

| Cys 273 to Cys | Mass     | Z | m/z    | Present?   |
|----------------|----------|---|--------|------------|
| 31             | 1,316.59 | 2 | 659.30 | No         |
| 65             | 1,362.64 | 2 | 664.33 | No         |
| 116 & 127      | 4,400.03 | 6 | 734.35 | No         |
| 200            | 4,828.32 | 6 | 805.73 | No         |
| 273            | 1,872.88 | 2 | 937.45 | No         |
| 290            | 1,870.88 | 2 | 936.45 | <b>Yes</b> |
| 373            | 3,666.72 | 4 | 917.69 | No         |
| 428            | 4,016.08 | 5 | 804.22 | No         |

**Supplementary table 1: The disulfide links two tryptic peptides, residues 268-274 with Cys273 and residues 284-291 with Cys290.** Mass of Cys273 linked with all the other cysteines containing tryptic peptides. The listed m/z was used to obtain the EIC in figure 4A.
